# Supplementary material
Source: PubMed Central journal article supplement (PMC3993690)
Supplement: JCM.03617-13_zjm999093335so1.pdf [file JCM.03617-13_zjm999093335so1.pdf]

| Isolate       | Serotype   | SSI typing                                                       | VirulenceFinder                                                                                                                       | MLST   | Coverage <sup>i</sup> | N50                | Comment                                                  |
|---------------|------------|------------------------------------------------------------------|---------------------------------------------------------------------------------------------------------------------------------------|--------|-----------------------|--------------------|----------------------------------------------------------|
| <b>Week 1</b> |            |                                                                  |                                                                                                                                       |        |                       |                    |                                                          |
| C570-12       | O157:H-    | <i>eae, vtx1a, vtx2c</i><br>Haemolysis,<br><i>ehxA</i><br>VCA(+) | <i>astA, eae, ehxA, espA, espB, espF, espJ, espP, etpD, gad, iha, iss, katP, nleA, nleB, nleC, prfB, tir, vtx1a, vtx2c</i>            | ST-11  | 37x                   | 121635             | PFGE.                                                    |
| C541-12       | O157:H-    | <i>eae, vtx1a, vtx2c</i><br>Haemolysis,<br><i>ehxA</i><br>VCA(+) | <i>astA, eae, ehxA, espA, espB, espF, espJ, espP, etpD, gad, iha, iss, katP, nleA, nleB, nleC, prfB, tir, vtx1a</i>                   | ST-11  | 24x                   | 103757             | PFGE.                                                    |
| C641-12A      | O180:H-    | <i>eae</i><br>Haemolysis,<br><i>ehxA</i><br>VCA(-)               | <i>astA, eae, ehxA, espA, espB, espF, espI, espP, gad, nleB, prfB, tir</i>                                                            | ST-301 | 47x                   | 73908              | From same patient as C641-12B. PFGE.                     |
| C641-12B      | O180:H-    | <i>eae, (vtx2a)</i><br>Haemolysis,<br><i>ehxA</i><br>VCA(+)      | <i>astA, eae, ehxA, espA, espB, espF, espI, espP, gad, nleB, prfB, tir</i>                                                            | ST-301 | 110x                  | 77810              | From same patient as C641-12A. PFGE.                     |
| C696-12       | O26:H11    | <i>eae, vtx1a</i><br>Haemolysis,<br><i>ehxA</i><br>VCA(+)        | <i>astA, celb, cif, eae, efa1, ehxA, espA, espB, espF, espJ, espP, gad, iss, katP, lpfA, nleA, nleB, nleC, prfB, tir, toxB, vtx1a</i> | ST-11  | 42x                   | 78574              | PFGE.                                                    |
| C697-12A      | O157:H7    | <i>eae, vtx1a, vtx2c</i><br>Haemolysis,<br><i>ehxA</i><br>VCA(+) | <i>astA, eae, ehxA, espA, espB, espF, espJ, espP, etpD, gad, iha, iss, katP, nleA, nleB, nleC, prfB, tir, toxB, vtx1a, vtx2c</i>      | ST-11  | 42x<br>53x (R)        | 103670<br>92026(R) | From same patient as C697-12B. Replicate sequence. PFGE. |
| C697-12B      | O157:H-    | <i>eae, vtx1a, vtx2c</i><br>Haemolysis,<br><i>ehxA</i><br>VCA(+) | <i>astA, eae, ehxA, espA, espB, espJ, espP, etpD, iha, iss, katP, nleA, nleB, nleC, prfB, tir, toxB, vtx1a, vtx2c</i>                 | ST-11  | 56x                   | 117209             | From same patient as C697-12A. PFGE.                     |
| <b>Week 2</b> |            |                                                                  |                                                                                                                                       |        |                       |                    |                                                          |
| C748-12       | O128ab:H2  | <i>vtx2b</i><br>Haemolysis,<br><i>ehxA</i><br>VCA(+)             | <i>celb, ehxA, gad, iha, ireA, iss, lpfA, mchB, mchC, mchF, prfB, senB, subA, vtx2b</i>                                               | ST-25  | 91x                   | 76452              |                                                          |
| C749-12       | O55:H12    | <i>vtx1a</i><br><i>saa</i><br>VCA(+)                             | <i>cdtB, cnf1, espP, gad, iha, iss, lpfA, prfB, (saa), vtx1a</i>                                                                      | ST-101 | 32x                   | 108930             | PFGE.                                                    |
| C750-12       | O5:H-      | <i>vtx1c</i><br>Haemolysis,<br><i>ehxA</i><br>VCA(+)             | <i>ehxA, espI, gad, iha, ireA, iss, lpfA, prfB, subA, vtx1c</i>                                                                       | ST-447 | 91x                   | 32602              |                                                          |
| C751-12       | O117:K1:H7 | <i>vtx1a</i><br>VCA(-)                                           | <i>iha, iroN, iss, prfB, sigA, vtx1a</i>                                                                                              | ST-504 | 20x                   | 37148              |                                                          |
| <b>Week 3</b> |            |                                                                  |                                                                                                                                       |        |                       |                    |                                                          |
| C659-12       | O117:K1:H7 | <i>vtx1a</i><br>VCA(-)                                           | <i>astA, gad, iha, prfB, senB, sigA, vtx1a</i>                                                                                        | ST-504 | 25x                   | 30593              |                                                          |
| C757-12       | O103:H2    | <i>eae, vtx1a</i><br>Haemolysis,<br><i>ehxA</i><br>VCA(+)        | <i>cif, eae, efa1, ehxA, espA, espB, espF, espJ, etpD, gad, iss, nleA, nleB, prfB, tir, vtx1a</i>                                     | ST-17  | 25x                   | 30193              | PFGE.                                                    |
| C760-12       | O117:K1:H7 | <i>vtx1a</i><br>VCA(-)                                           | <i>astA, celb, iha, prfB, senB, sigA, vtx1a</i>                                                                                       | ST-504 | 31x                   | 43540              |                                                          |

|               |            |                                                                  |                                                                                                                                  |         |               |                   |                                                |
|---------------|------------|------------------------------------------------------------------|----------------------------------------------------------------------------------------------------------------------------------|---------|---------------|-------------------|------------------------------------------------|
| C767-12       | O145:H34   | <i>eae</i><br>VCA(-)                                             | <i>celb, gad, iha, ireA, iss, lpfA, mchF, prfB, vtx2b</i>                                                                        | ST-829  | 15x           | 29439             | Excluded due to mix-up                         |
| C770-12       | O27:H30    | <i>vtx2b</i><br>Haemolysis<br>VCA(+)                             | <i>astA, gad, iha, ireA, iss, mchB, mchC, mchF, prfB, subA, vtx2b</i>                                                            | ST-753  | 25x<br>93x(R) | 33472<br>88293(R) | Replicate sequence                             |
| <b>Week 4</b> |            |                                                                  |                                                                                                                                  |         |               |                   |                                                |
| C813-12       | O103:H-    | <i>eae, vtx1a</i><br>Haemolysis,<br><i>ehxA</i><br>VCA(+)        | <i>cif, eae, efa1, (ehxA,) espA, espB, espI, espJ, espP, gad, katP, nleA, nleB, nleC, prfB, tir, vtx1a</i>                       | ST-1967 | 18x           | 15964             | PFGE.                                          |
| C812-12       | O157:H7    | <i>eae, vtx1a, vtx2a</i><br>Haemolysis,<br><i>ehxA</i><br>VCA(+) | <i>astA, eae, ehxA, espA, espB, espJ, espP, etpD, gad, iha, iss, katP, nleA, nleB, nleC, prfB, tir, toxB, vtx1a, vtx2a</i>       | ST-11   | 45x           | 111153            | PFGE.                                          |
| <b>Week 5</b> |            |                                                                  |                                                                                                                                  |         |               |                   |                                                |
| C816-12       | O145:H-    | <i>eae, vtx2a</i><br>Haemolysis,<br><i>ehxA</i><br>VCA(-)        | <i>astA, cif, eae, ehxA, espA, espB, espF, espJ, espP, gad, iha, iss, nleA, nleB, nleC, prfB, tir, toxB, vtx2a</i>               | ST-32   | 43x           | 116786            | Received later as C884-12. PFGE.               |
| C818-12       | O157:H7    | <i>eae, vtx1a, vtx2a</i><br>Haemolysis,<br><i>ehxA</i><br>VCA(+) | <i>astA, eae, ehxA, espA, espB, espJ, espP, etpD, gad, iha, iss, katP, nleA, nleB, nleC, prfB, tir, toxB, vtx1a, vtx2a</i>       | ST-11   | 36x           | 107822            | Patient relation to C849-12 and C852-12. PFGE. |
| C819-12       | O157:H7    | <i>eae, vtx1a, vtx2a</i><br>Haemolysis,<br><i>ehxA</i><br>VCA(+) | <i>astA, eae, ehxA, espA, espB, espJ, espP, etpD, gad, iha, iss, katP, nleA, nleB, nleC, prfB, tir, toxB, vtx1a, vtx2a</i>       | ST-11   | 54x           | 142323            | Patient relation to C863-12. PFGE.             |
| C820-12       | O128abc:H- | <i>eae, vtx2f (bfpA)</i><br>VCA(+)                               | <i>astA, cba, cif, cma, eae, espA, espB, espF, gad, iss, nleB, nleC, prfB, tir, vtx2f</i>                                        | ST-20   | 38x           | 79409             |                                                |
| C821-12       | O121:H19   | <i>eae, vtx2a</i><br>Haemolysis,<br><i>ehxA</i><br>VCA(+)        | <i>astA, eae, efa1, ehxA, espA, espB, espI, espJ, espP, gad, lpfA, nleA, nleB, nleC, prfB, tir, toxB, vtx2a</i>                  | ST-655  | 45x           | 122181            |                                                |
| C849-12       | O157:H7    | <i>eae, vtx1a, vtx2a</i><br>Haemolysis,<br><i>ehxA</i><br>VCA(+) | <i>astA, eae, ehxA, espA, espB, espF, espJ, espP, etpD, gad, iha, iss, katP, nleA, nleB, nleC, prfB, tir, toxB, vtx1a, vtx2a</i> | ST-11   | 38x           | 117371            | Patient relation to C818-12 and C852-12. PFGE. |
| C848-12       | O78:Hbev   | VCA(-)                                                           | -                                                                                                                                | -       | 45x           | 179879            | Excluded <i>Morganella</i>                     |
| C850-12       | O rough:H2 | <i>eae, vtx1a</i><br>Haemolysis,<br><i>ehxA</i><br>VCA(-)        | <i>astA, cif, eae, efa1, ehxA, espA, espB, espJ, etpD, gad, iss, nleA, nleB, prfB, tir, vtx1a</i>                                | ST-17   | 36x           | 73556             |                                                |
| <b>Week 6</b> |            |                                                                  |                                                                                                                                  |         |               |                   |                                                |
| C852-12       | O157:H7    | <i>eae, vtx1a, vtx2a</i><br>Haemolysis,<br><i>ehxA</i><br>VCA(+) | <i>astA, eae, ehxA, espA, espB, espF, espJ, espP, etpD, gad, iha, iss, katP, nleA, nleB, nleC, prfB, tir, toxB, vtx1a, vtx2a</i> | ST-11   | 53x           | 104244            | Patient relation to C818-12 and C849-12        |
| C857-12       | O145:H-    | <i>eae, vtx2a</i><br>Haemolysis,<br><i>ehxA</i><br>VCA(+)        | <i>astA, cif, eae, ehxA, espA, espB, espI, espJ, espP, gad, iha, iss, katP, nleA, nleB, nleC, prfB, tir, toxB, vtx2a</i>         | ST-32   | 65x           | 97109             | PFGE.                                          |

|               |            |                                                                            |                                                                                                                                                          |             |     |        |                                              |
|---------------|------------|----------------------------------------------------------------------------|----------------------------------------------------------------------------------------------------------------------------------------------------------|-------------|-----|--------|----------------------------------------------|
| C862-12       | O128abc:H- | <i>eae, vtx2f</i><br>( <i>bfpA</i> )<br>VCA(+)                             | <i>astA, cba, cif, cma, eae, espA,</i><br><i>espB, espF, gad, iss, nleA, nleB,</i><br><i>nleC, prfB, tir, vtx2f</i>                                      | ST-20       | 39x | 67763  |                                              |
| C863-12       | O157:H7    | <i>eae, vtx1a,</i><br><i>vtx2a</i><br>Haemolysis,<br><i>ehxA</i><br>VCA(+) | <i>astA, eae, ehxA, espA, espB,</i><br><i>espJ, espP, etpD, gad, iha, iss,</i><br><i>katP, nleA, nleB, nleC, prfB, tir,</i><br><i>toxB, vtx1a, vtx2a</i> | ST-11       | 42x | 121712 | Patient<br>relation to<br>C819-12.<br>PFGE.  |
| C864-12       | O128ab:H2  | <i>vtx1c, vtx2b</i><br>Haemolysis,<br><i>ehxA</i><br>VCA(+)                | <i>celb, ehxA, gad, iha, iss, lpfA,</i><br><i>mchB, mchC, mchF, prfB, vtx1c,</i><br><i>vtx2b</i>                                                         | ST-811      | 45x | 68959  |                                              |
| <b>Week 7</b> |            |                                                                            |                                                                                                                                                          |             |     |        |                                              |
| C874-12       | O146:H21   | <i>vtx1c, vtx2b</i><br>Haemolysis,<br><i>ehxA</i><br>VCA(+)                | <i>ehxA, gad, ireA, iss, lpfA, mchB,</i><br><i>mchC, mchF, prfB, senB, subA,</i><br><i>vtx1c, vtx2b</i>                                                  | ST-442      | 31x | 110113 | PFGE.                                        |
| C884-12       | O145:H-    | <i>eae, vtx2a</i><br>Haemolysis,<br><i>ehxA</i><br>VCA(-)                  | <i>astA, cif, eae, ehxA, espA, espB,</i><br><i>espJ, espP, gad, iha, iss, nleA,</i><br><i>nleB, nleC, prfB, tir, toxB, vtx2a</i>                         | ST-32       | 39x | 135864 | Received<br>earlier as<br>C816-12.<br>PFGE.  |
| C885-12A      | O146:H21   | <i>eae</i><br>VCA(-)                                                       | <i>cif, eae, espA, espF, espJ, gad,</i><br><i>lpfA, nleB, prfB, tir</i>                                                                                  | ST-442      | 32x | 116386 | Received<br>later as<br>C896-12B             |
| C885-12B      | O115:H-    | <i>eae, vtx2a</i><br>Haemolysis,<br><i>ehxA</i><br>VCA(+)                  | <i>astA, eae, ehxA, espA, espF,</i><br><i>espI, espJ, espP, gad, lpfA, nleB,</i><br><i>prfB, tir, vtx2a</i>                                              | ST-333      | 42x | 71345  | Received<br>later as<br>C896-12A             |
| C886-12       | O145:H-    | <i>eae, vtx2a</i><br>Haemolysis,<br><i>ehxA</i><br>VCA(+)                  | <i>astA, cif, eae, ehxA, espA, espB,</i><br><i>espI, espJ, espP, gad, iha, iss,</i><br><i>nleA, nleB, nleC, prfB, tccP, tir,</i><br><i>toxB, vtx2a</i>   | ST-32       | 71x | 109186 | PFGE.                                        |
| C887-12       | O36:H-     | VCA(-)                                                                     | <i>astA, gad, lpfA, prfB</i>                                                                                                                             | -           | 30x | 168502 |                                              |
| C891-12       | O157:H7    | <i>eae, vtx2c</i><br>Haemolysis,<br><i>ehxA</i><br>VCA(+)                  | <i>astA, eae, ehxA, espA, espB,</i><br><i>espJ, espP, etpD, iha, iss, katP,</i><br><i>nleA, nleB, nleC, prfB, tir, vtx2c</i>                             | ST-<br>2966 | 24x | 91704  | PFGE.                                        |
| C892-12       | OX187:H28  | <i>vtx2d</i><br>VCA(-)                                                     | <i>celb, gad, katP, lpfA, prfB, vtx2g</i>                                                                                                                | ST-200      | 41x | 102382 |                                              |
| C893-12       | O181:H16   | <i>vtx1a</i><br>Haemolysis,<br><i>ehxA</i><br>VCA(+)                       | <i>cba, cma, ehxA, espI, gad, iha,</i><br><i>ireA, lpfA, mchB, mchC, mchF,</i><br><i>prfB, senB, subA, vtx1c</i>                                         | -           | 44x | 90784  |                                              |
| C894-12       | O157:H7    | <i>eae, vtx2a</i><br>Haemolysis,<br><i>ehxA</i><br>VCA(+)                  | <i>astA, eae, ehxA, espA, espB,</i><br><i>espJ, espP, etpD, gad, iha, iss,</i><br><i>katP, nleA, nleB, nleC, prfB, tir,</i><br><i>toxB, vtx2a</i>        | ST-11       | 71x | 105953 | PFGE.                                        |
| C895-12       | O rough: - | <i>vtx2a</i><br>Haemolysis<br>VCA(+)                                       | <i>gad, iha, lpfA, mchC, mchF, pic,</i><br><i>prfB, sigA, vtx2a</i>                                                                                      | ST-678      | 40x | 72589  | PFGE.                                        |
| C896-12A      | O115:H-    | <i>eae, vtx2a</i><br>Haemolysis,<br><i>ehxA</i><br>VCA(-)                  | <i>astA, eae, ehxA, espA, espF,</i><br><i>espI, espJ, espP, nleA, nleB,</i><br><i>prfB, tir, vtx2a</i>                                                   | ST-333      | 60x | 72435  | Received<br>earlier as<br>C885-12B.<br>PFGE. |
| C896-12B      | O146:H21   | <i>eae</i><br>Haemolysis<br>VCA(-)                                         | <i>cif, eae, espA, espF, espJ, gad,</i><br><i>lpfA, nleB, prfB, tir</i>                                                                                  | ST-442      | 28x | 95889  | Received<br>earlier as<br>C885-12A.<br>PFGE. |

|          |         |                                                                |                                                                                                                                               |        |     |       |       |
|----------|---------|----------------------------------------------------------------|-----------------------------------------------------------------------------------------------------------------------------------------------|--------|-----|-------|-------|
| C904-12A | O76:H-  | <i>vtx1c</i><br>Haemolysis,<br><i>ehxA</i><br>VCA(+)           | <i>celb, ehxA, gad, iha, ireA, lpfA,<br/>pic, prfB, subA, vtx1c</i>                                                                           | ST-675 | 56x | 54694 | PFGE. |
| C905-12  | O165:H- | <i>eae, vtx1, vtx2</i><br>Haemolysis,<br><i>ehxA</i><br>VCA(+) | <i>astA, eae, efa1, ehxA, espA,<br/>espB, espF, espI, espJ, espP,<br/>gad, iss, katP, lpfA, nleA, nleB,<br/>nleC, prfB, tir, vtx1a, vtx2a</i> | ST-119 | 41x | 84914 | PFGE. |

<sup>i</sup> Average coverage was determined using an estimated genome size of 5.5Mb.

Supplementary material 1: Complete set of typing results from routine and WGS typing in this study, including sequence quality and epidemiological information on the isolates.

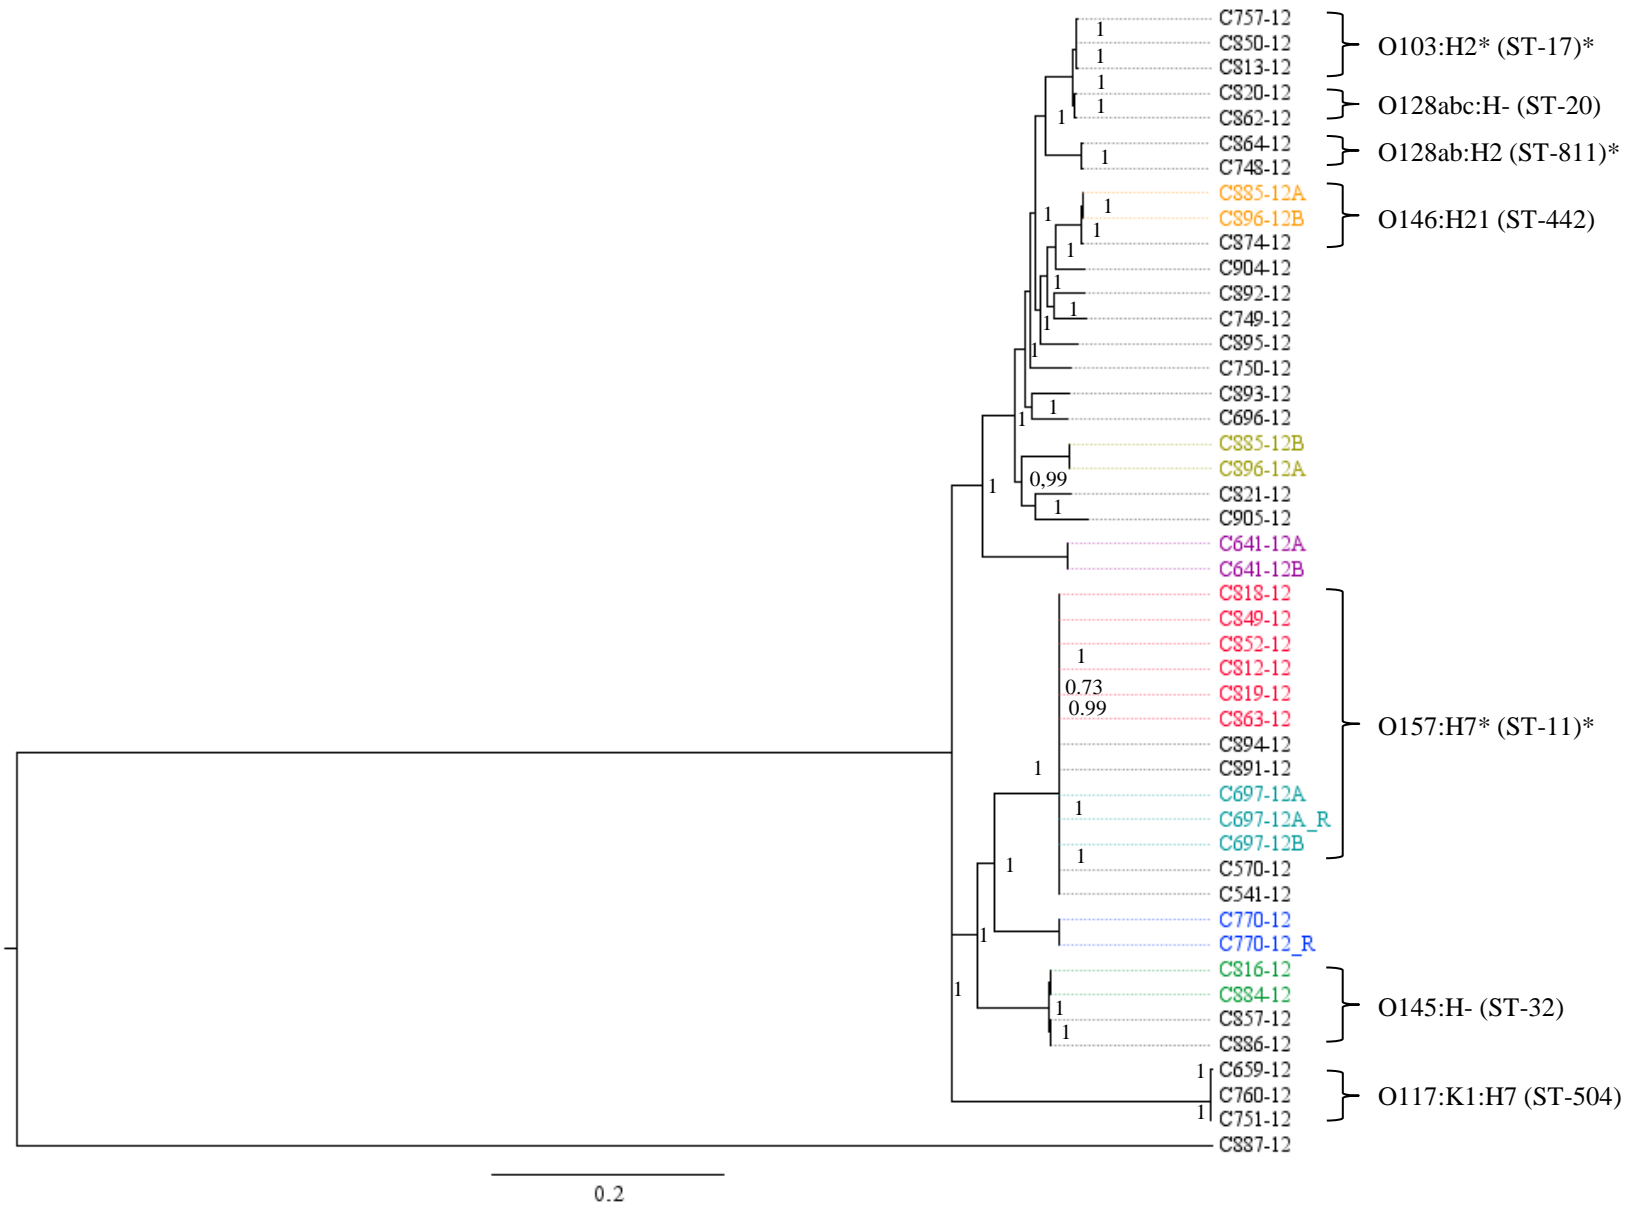

Supplementary material 4: Phylogeny by NDtree based on positions called in all sequences, using *Fasttree* for tree construction. In the ND matrix a Z-score of 1.96 was employed to obtain sufficient resolution. In total, 2476641 positions were called in all strains, and of these 223254 positions were not 100% conserved. Bootstrap values are assigned to each node.
